# Supplementary material for: Swelling properties of thermoresponsive/hydrophilic co-networks with functional crosslinked domain structures
Source: Royal Society of Chemistry journal article supplement (doi:10.1039/c7py01793f), 2018-01-01
Supplement: c7py01793f1.pdf [file c7py01793f1.pdf]

*Electronic Supplementary Information*

**Swelling Properties of Thermoresponsive/Hydrophilic Conetworks  
with Functional Crosslinked Domain Structure**

*Shohei Ida, Hironobu Kitanaka, Tatsuya Ishikawa, Shokyoku Kanaoka, and Yoshitsugu Hirokawa*

Department of Materials Science, The University of Shiga Prefecture,

2500 Hassaka, Hikone, Shiga 522-8533, Japan

E-mail: [ida.s@mat.usp.ac.jp](mailto:ida.s@mat.usp.ac.jp)

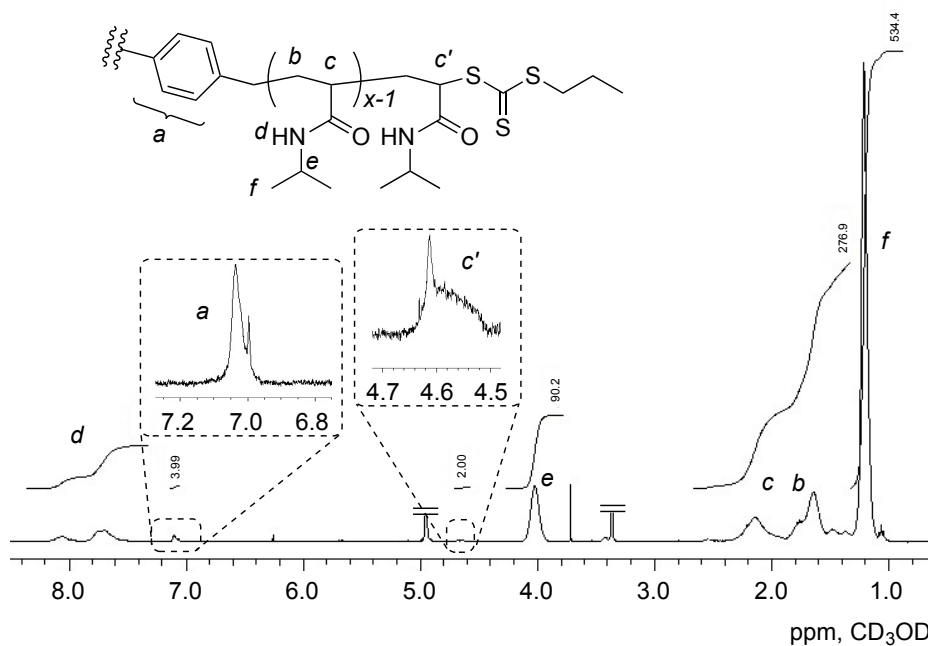

**Fig. S1**  $^1\text{H}$  NMR spectrum of PNIPAAm macro-CTA prepared by RAFT polymerization. Polymerization condition:  $[\text{NIPAAm}]_0 = 2000 \text{ mM}$ ,  $[\text{CTA-1}]_0 = 20 \text{ mM}$ ,  $[\text{AIBN}]_0 = 2.0 \text{ mM}$  in 1,4-dioxane at  $60^\circ\text{C}$  for 24 h. Experimental parameters: relaxation time = 4.0 s, number of scans = 8.

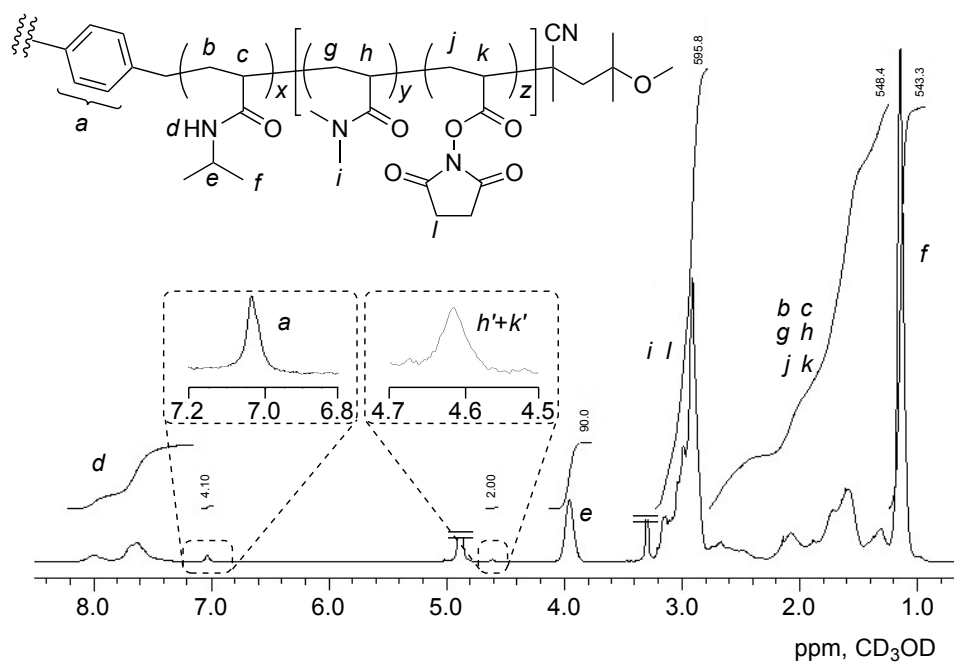

**Fig. S2**  $^1\text{H}$  NMR spectrum of **DND**. Reaction condition: (polymerization)  $[\text{DMAAm}] = 2000 \text{ mM}$ ,  $[\text{NHSA}] = 200 \text{ mM}$ ,  $[\text{PNIPAAm macro-CTA}] = 20 \text{ mM}$  in 1,4-dioxane at  $60^\circ\text{C}$ ,  $[\text{AIBN}] = 2.0 \text{ mM}$ ; (End modification)  $[\text{polymer}] = 5.0 \text{ mM}$ ,  $[\text{V-70}] = 200 \text{ mM}$  in 1,4-dioxane at  $40^\circ\text{C}$ . Experimental parameters: relaxation time = 4.0 s, number of scans = 8.

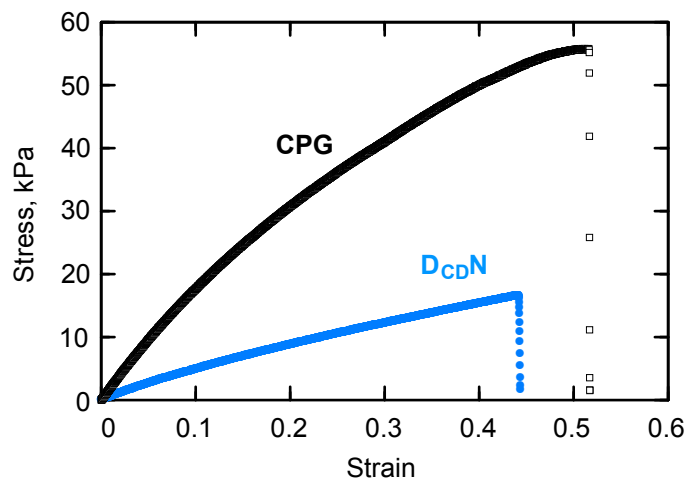

**Fig. S3** Stress-strain curves of as-prepared **D<sub>CD</sub>N** and **CPG** gels obtained by uniaxial tensile test. Here, **D<sub>CD</sub>N** gel was prepared in DMF because the gel prepared in THF was difficult to be employed for measurement due to solvent evaporation.

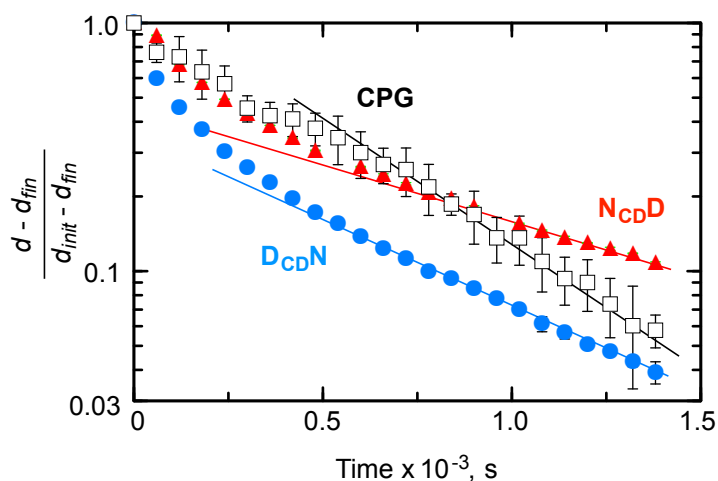

**Fig. S4** Kinetic analysis of the shrinking behavior of **D<sub>CD</sub>N**, **N<sub>CD</sub>D** and **CPG** upon temperature jump. When an isotropic shrinking is observed (**D<sub>CD</sub>N** and **N<sub>CD</sub>D**), the relaxation time ( $\tau$ ) can be determined from the slope of the line ( $-1/\tau$ ) at the late stage of shrinking ( $t > \tau$ ):  $t > 400$  s for **D<sub>CD</sub>N** and  $t > 700$  s for **N<sub>CD</sub>D**.
